# Supplementary material for: Insights into Fenton-like oxidation of oxytetracycline mediated by Fe-doped porous g-C3N4 nanomaterials: synthesis, performance and mechanism
Source: Royal Society of Chemistry journal article supplement (doi:10.1039/d3en00108c), 2023-01-01
Supplement: d3en00108c1.pdf [file d3en00108c1.pdf]

## Supplementary Material of

### **Insights into Fenton-like oxidation of oxytetracycline mediated by Fe doped porous g-C<sub>3</sub>N<sub>4</sub> nanomaterials: Synthesis, performance and mechanism**

Xiuqin Huo <sup>a,b</sup>, Huan Yi <sup>a,b</sup>, Eydhah Almatrafi <sup>b</sup>, Dengsheng Ma <sup>a</sup>, Yukui Fu <sup>a</sup>, Lei Qin <sup>a</sup>, Wu Xia <sup>a</sup>, Ling Xiang <sup>a</sup>, Fuhang Xu <sup>a</sup>, Huchuan Yan <sup>a</sup>, Chengyun Zhou <sup>a,b</sup>, Guangming Zeng <sup>a,b,\*</sup>, Cui Lai <sup>a,\*</sup>

<sup>a</sup> College of Environmental Science and Engineering and Key Laboratory of Environmental Biology and Pollution Control (Ministry of Education), Hunan University, Changsha, 410082, PR China.

<sup>b</sup> Center of Research Excellence in Renewable Energy and Power Systems, Center of Excellence in Desalination Technology, Department of Mechanical Engineering, Faculty of Engineering-Rabigh, King Abdulaziz University, Jeddah 21589, Saudi Arabia.

---

\*Corresponding author at: College of Environmental Science and Engineering, Hunan University, Changsha, Hunan 410082, China (G.M. Zeng and C. Lai).

Tel.: +86-731-88822754; fax: +86-731-88823701.

E-mail address: zgming@hnu.edu.cn (G.M. Zeng), laicui@hnu.edu.cn (C. Lai).

### ***Text S1 Materials***

Ferric chloride hexahydrate ( $\text{FeCl}_3 \cdot 6\text{H}_2\text{O}$ ), Dicyandiamide (DCDA), Ethylenediamine tetraacetic Acid (EDTA), Oxytetracycline (OTC), Hydrochloric acid (HCl), Sodium hydroxide (NaOH), Hydrogen peroxide ( $\text{H}_2\text{O}_2$ ), Tertiary butanol (TBA), Tetramethylpiperidinyloxy (TEMPOL) and sodium oxalate ( $\text{C}_2\text{Na}_2\text{O}_4$ ) were of analytical grade and purchased from Sinopharm Chemical Reagent Corp (Beijing, China). All solutions were prepared by using ultrapure water with a resistivity of 18.25 M $\Omega$ .

### ***Test S2 Characterization of Fe/PCN***

Powder X-ray diffraction (XRD-6100, Cu K $\alpha$  radiation,  $\lambda=0.15418$  nm) was used to determine the crystal phases of Fe/PCN with the scanning range from 10° to 70°. Morphology and microstructure of the prepared samples were examined by scanning electron microscope (SEM, Zeiss Sigma 500) and transmission electron microscope (TEM, FEI Tecnai G2 f20 s-twin 200kV). The element composition of catalyst was determined through an energy-dispersive spectrometry (EDS)-elemental mapping. The surface chemical elemental compositions and valence state were examined using X-ray photoelectron spectroscopy (XPS, Thermo K-Alpha+) with Al K $\alpha$  source ( $h\nu = 1486.6$  eV). Fourier transform infrared (FT-IR) spectrophotometer (Perkin Elmer spectrum 100) was employed to characterize the surface functional groups. And the specific surface areas and pore volume of the prepared composites were characterized by Brunauer-Emmett-Teller (BET) method.

### ***Test S3 Degradation intermediates identification***

The degradation intermediates of OTC were identified by a LC-MS system (1290/6460 Triple Quad, Agilent) equipped with a Kromasil C18 column (250 × 4.6 mm, 5 μm). The elution was performed via 0.1% (v/v) of formic acid aqueous solution (A) and acetonitrile (B) at a flow rate of 0.2 mL min<sup>-1</sup>. The injection volume was 2 μL, and the column temperature was 30 °C. Linear gradient elution as follows: the initial 90% A was reduced to 10% A over 10 min and kept 4 min. Then the mobile phase A returned to 90% in 1 min and maintained 1min. MS was conducted in the positive ion mode using an electrospray ionization (ESI) source under the following conditions: capillary voltage, 4.0 kV; gas (N<sub>2</sub>) flow rate, 11 L min<sup>-1</sup>; gas temperature, 300 °C; nebulization pressure, 15 psi. MS was scanned by mass range from 100 to 500 m/z.

#### ***Test S4 Photoelectrochemical measurement***

Photoelectrochemical test was performed on electrochemical workstation (CHI760E). Sodium sulfate solution (Na<sub>2</sub>SO<sub>4</sub>, 0.2 M) was used as the electrolyte, and the light source was supplied by a 300 W xenon lamp (CEL-HXF300, Ceaulight) fitted with a 420 nm cutoff filter (155 mW cm<sup>-2</sup>). The platinum wire was used as the counter electrode and Ag/AgCl electrode were utilized as the reference electrode. The working electrode was prepared by our photocatalyst: 0.01g of the sample was appended to 0.001 L of 25% (W/V) PVA solution and sonicated for half an hour to get suspension. Then, the suspension was coated onto a fluorine-doped tin oxide (FTO) glass (1 × 2 cm<sup>2</sup>) which was respectively precleaned by acetone, ethanol and deionized water. Finally, the obtained electrode was laid in an oven at 110 °C for 60 min. The photocurrent-time measurement (IT) was measured on an applied voltage of 0 V with

the light on or off every 20 seconds. The electrochemical impedance spectroscopy (EIS) was collected on an applied voltage of 0 V with an amplitude of 0.005 V over a frequency between  $10^{-2}$  and  $10^5$  Hz. Moreover, Mott-Schottky curve were also recorded at the frequency of 1000 Hz.

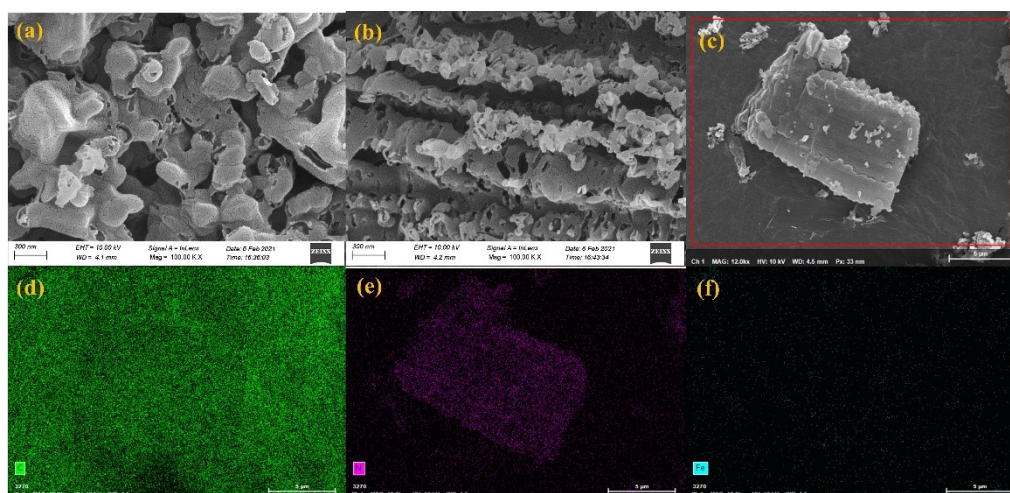

Fig. S1 SEM images of (a) 0.027Fe/PCN, (b) 0.081Fe/PCN; (c-f) SEM-Mapping of 0.054Fe/PCN.

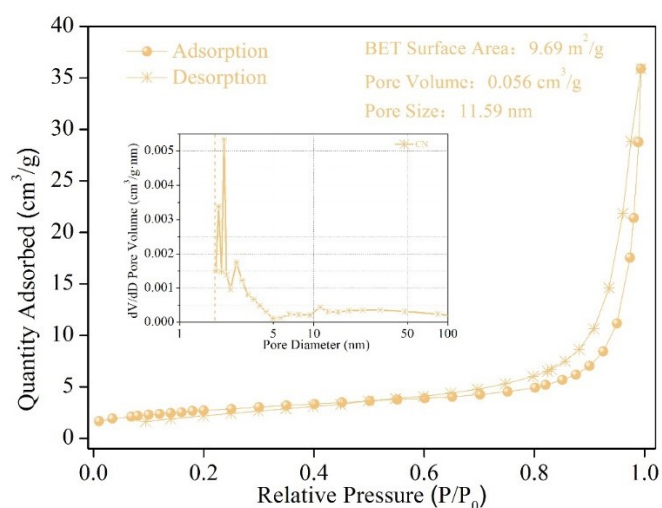

Fig. S2  $\text{N}_2$  adsorption-desorption isotherms of CN, the insert image was pore size distribution curves.

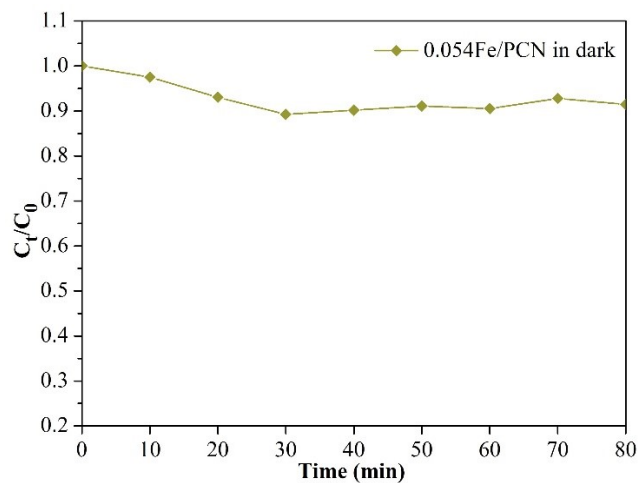

Fig. S3 The adsorption equilibrium curves over 0.054Fe/PCN

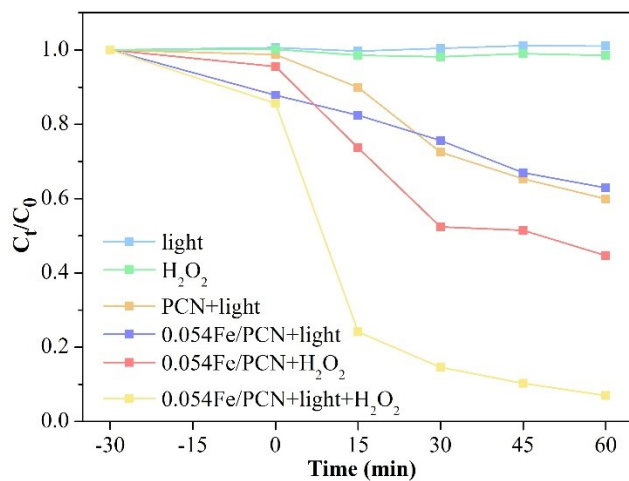

Fig.S4 The OTC degradation in different condition.

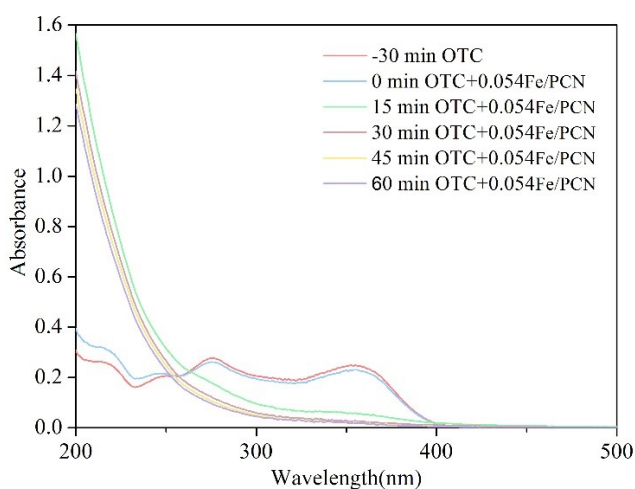

Fig. S5 Time-dependent UV-Vis absorption spectra of OTC in the presence of 0.054Fe/PCN.

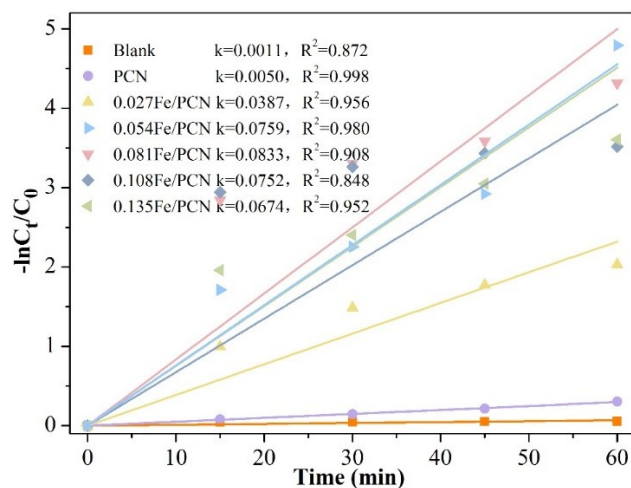

Fig. S6 The kinetics ( $k / \text{min}^{-1}$ ) of OTC under visible light by PCN and xFe/PCN.

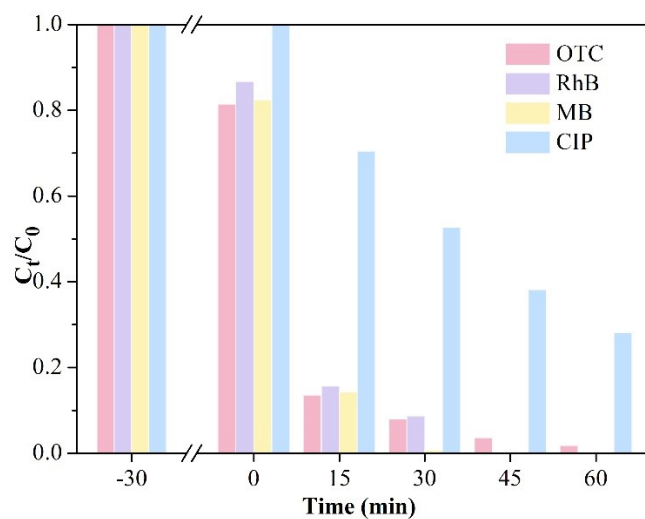

Fig. S7 The degradation for different organics over 0.054Fe/PCN.

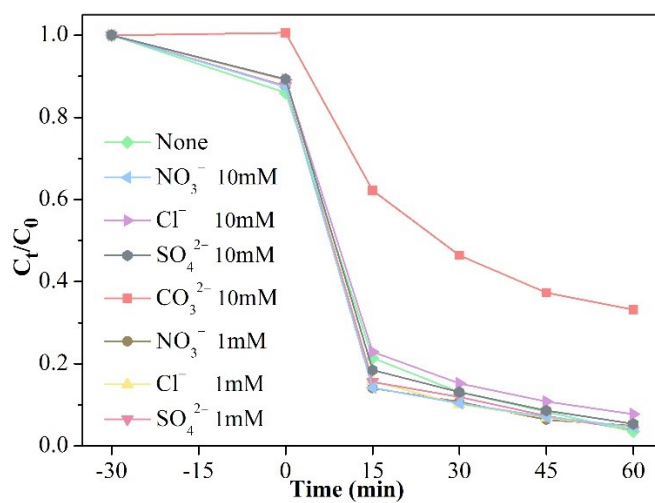

Fig. S8 The OTC degradation with different concentration of inorganic salt ions.

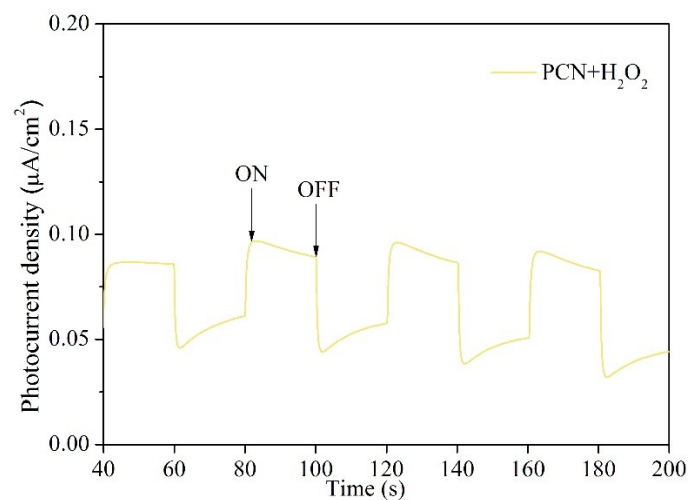

Fig. S9 The transient photocurrent-time response curves of PCN and PCN+H<sub>2</sub>O<sub>2</sub>.

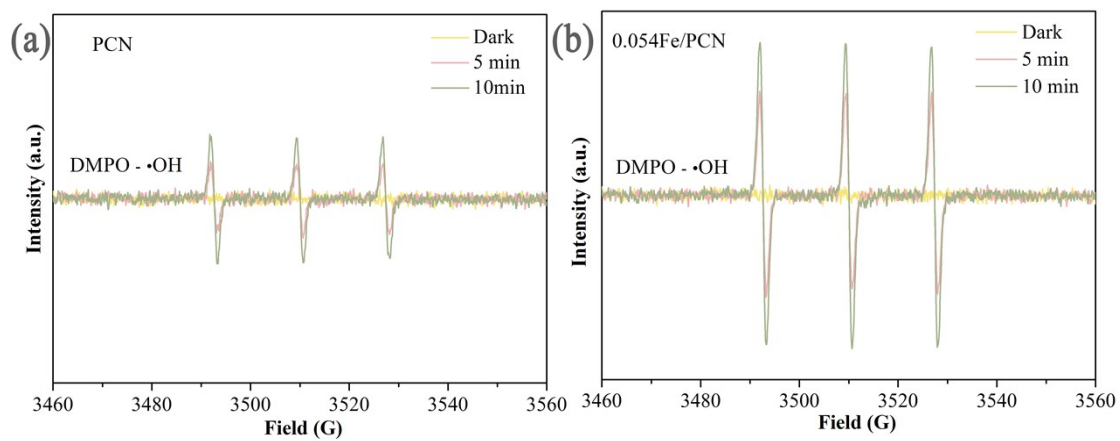

Fig. S10 DMPO-•OH signal of PCN+H<sub>2</sub>O<sub>2</sub> and 0.054Fe/PCN+H<sub>2</sub>O<sub>2</sub> in dark and visible-light irradiation. (0 min represents dark condition)

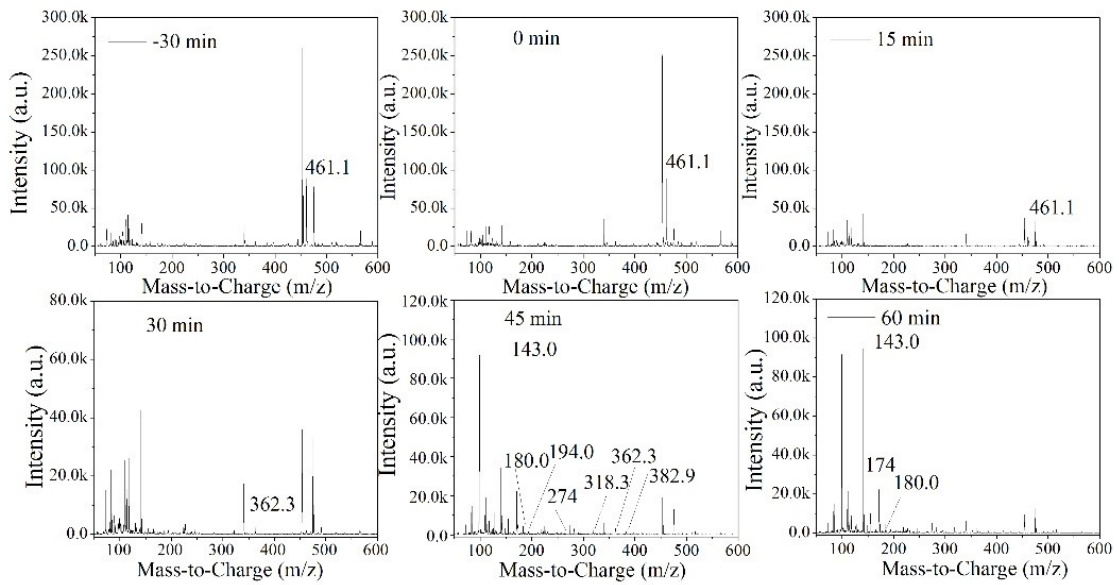

Fig. S11 LC-MS spectra of the OTC intermediates eluted in the degradation process:  
 (a) original OTC solution, (b) after 30 min adsorption, (c) light on 15 min, (d) light on 30 min, (e) light on 45 min, (f) light on 60 min.

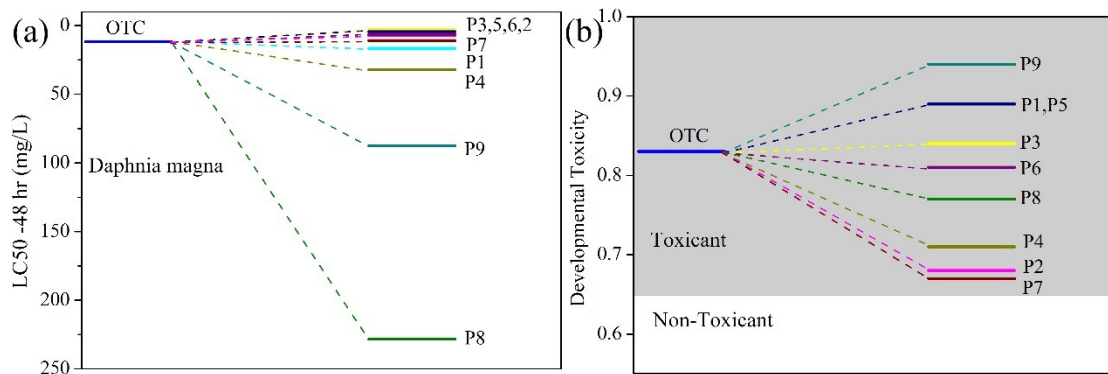

Fig. S12 (a) *Daphnia magna* LC50-48hr; (b) the developmental toxicity of OTC and predictive intermediates.



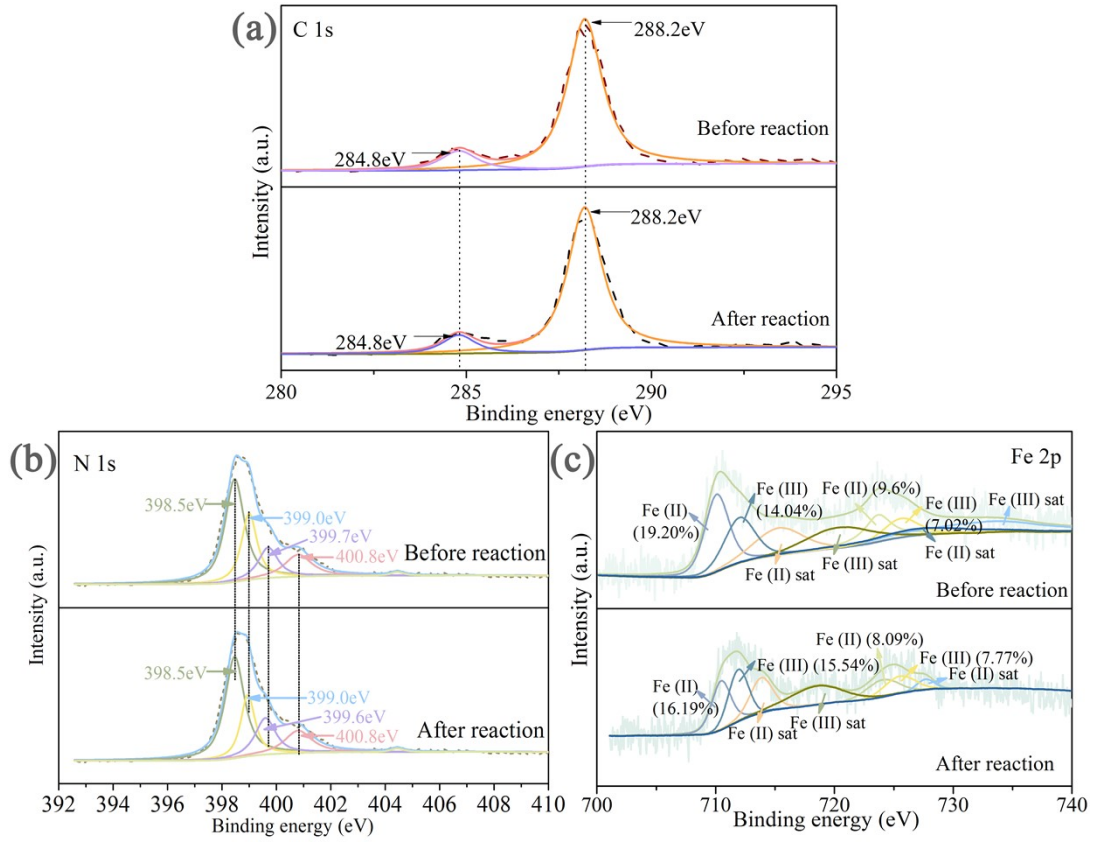

Fig. S13 XPS spectrum of (a) C, (b) N and (c) Fe of fresh and used 0.054 Fe/PCN.

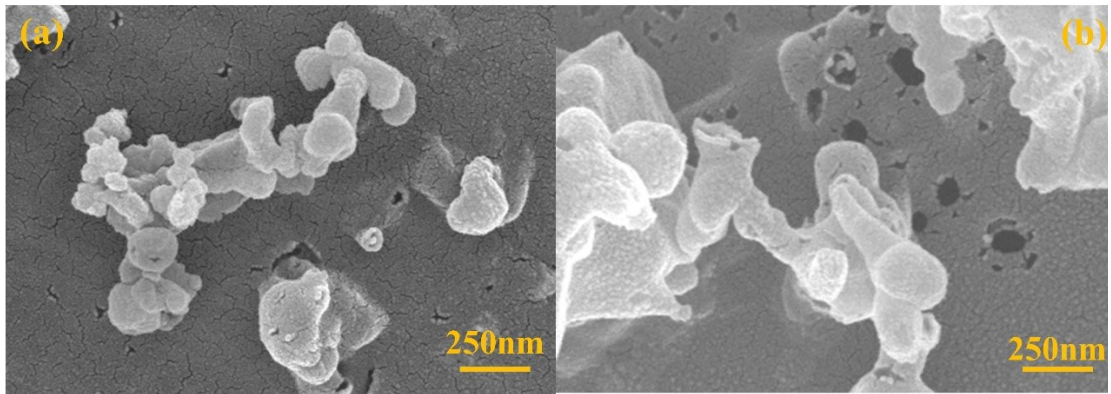

Fig. S14 The morphology of (a) fresh and (b) used 0.054 Fe/PCN.

**Table S1** The element content (at%) of PCN, 0.054Fe/PCN determined by XPS.

| Samples     | C     | N     | O    | C/N   |
|-------------|-------|-------|------|-------|
| PCN         | 43.34 | 53.3  | 3.36 | 81.31 |
| 0.054Fe/PCN | 40.59 | 49.81 | 8.21 | 81.49 |

**Table S2** Proportion of different chemical bonds about C atoms in different samples.

| Samples     | defective C-C | N=C-N  |
|-------------|---------------|--------|
| PCN         | 5.21%         | 94.79% |
| 0.054Fe/PCN | 11.49%        | 88.51% |

**Table S3** Proportion of different chemical bonds about N atoms in different samples.

| Samples     | C=N-C  | N-(C) <sub>3</sub> | N-H <sub>x</sub> | Fe-N   | $\pi$ - $\pi^*$ excitations |
|-------------|--------|--------------------|------------------|--------|-----------------------------|
| PCN         | 44.21% | 39.67%             | 15.84%           |        | 0.28%                       |
| 0.054Fe/PCN | 46.72% | 24.00%             | 14.06%           | 14.04% | 1.18%                       |

**Table S4** Comparison of the catalytic performance of 0.054 Fe/PCN and other catalysts.

| Catalysts                                                          | Dosage    | Organics | C <sub>Org</sub> (ppm) | C <sub>H2O2</sub> (mM) | Time (min) | conversion | Ref       |
|--------------------------------------------------------------------|-----------|----------|------------------------|------------------------|------------|------------|-----------|
| MnFe <sub>2</sub> O <sub>4</sub> /g-C <sub>3</sub> N <sub>4</sub>  | 0.25g/L   | OTC      | 30                     | 125                    | 60         | 80.5%      | 1         |
| ErFeO <sub>3</sub> /g-C <sub>3</sub> N <sub>4</sub>                | 0.5g/L    | OTC      | 20                     | 50                     | 80         | 99.7%      | 2         |
| Bi <sub>2</sub> WO <sub>6</sub> /CoAl-LDHs                         | 1 g/L     | OTC      | 10                     | 50                     | 60         | 98.47%     | 3         |
| CuFeO QDs/CNNSs                                                    | 0.5g/L    | TC       | 50                     | 100                    | 25         | 99.8%      | 4         |
| FeTi/CN                                                            | 0.1 g/L   | OTC      | 10                     | 20                     | 60         | 98%        | 5         |
| FePc/g-C <sub>3</sub> N <sub>4</sub>                               | 0.125 g/L | OTC      | 10                     | 12.5                   | 60         | 88.48 %    | 6         |
| Cu <sub>0.5</sub> Mn <sub>0.5</sub> Fe <sub>2</sub> O <sub>4</sub> | 0.5g/L    | OTC      | 46                     | 97.89                  | 120        | 100%       | 7         |
| FeMo <sub>3</sub> O <sub>x</sub> /g-C <sub>3</sub> N <sub>4</sub>  | 1.33 g/L  | TC       | 25                     | 20                     | 60         | 100%       | 8         |
|                                                                    | 1.33 g/L  | OTC      | 25                     | 20                     | 60         | 97.1%      |           |
| MgFe <sub>2</sub> O <sub>4</sub> @g-C <sub>3</sub> N <sub>4</sub>  | 0.5 g/L   | TC       | 20                     | 80                     | 60         | 90.79%     | 9         |
| Fe/PCN                                                             | 0.2 g/L   | OTC      | 10                     | 5                      | 60         | 99.2%      | This work |

**Table S5** Information of the intermediates.

| Compounds | Formula                                                       | m/z | Proposed structure                                                                    |
|-----------|---------------------------------------------------------------|-----|---------------------------------------------------------------------------------------|
| OTC       | C <sub>22</sub> H <sub>24</sub> N <sub>2</sub> O <sub>9</sub> | 461 | 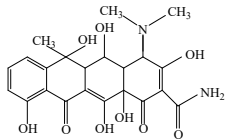 |
| P1        | C <sub>21</sub> H <sub>21</sub> NO <sub>6</sub>               | 383 |  |
| P2        | C <sub>19</sub> H <sub>23</sub> NO <sub>6</sub>               | 362 |  |
| P3        | C <sub>18</sub> H <sub>23</sub> NO <sub>4</sub>               | 318 |  |

---

|    |                   |     |  |
|----|-------------------|-----|--|
| P4 | $C_{15}H_{18}O_5$ | 279 |  |
| P5 | $C_{18}H_{24}O_2$ | 274 |  |
| P6 | $C_{12}H_{16}O_2$ | 192 |  |
| P7 | $C_{11}H_{14}O_2$ | 178 |  |
| P8 | $C_{10}H_{20}O_2$ | 172 |  |
| P9 | $C_9H_{18}O$      | 142 |  |

---

## Reference

1. H. Sun, T. Zhou, J. Kang, Y. Zhao, Y. Zhang, T. Wang and X. Yin, High-efficient degradation of oxytetracycline by visible photo-Fenton process using MnFe<sub>2</sub>O<sub>4</sub>/g-C<sub>3</sub>N<sub>4</sub>: Performance and mechanisms, *Separation and Purification Technology*, 2022, **299**, 121771.
2. L. Wang, X. Ran, B. Xiao, L. Lei, J. Zhu, X. Xi, G. Feng, R. Li and J. Feng, Visible light assisted Fenton degradation of oxytetracycline over perovskite ErFeO<sub>3</sub>/porous g-C<sub>3</sub>N<sub>4</sub> nanosheets p-n heterojunction, *Journal of Environmental Chemical Engineering*, 2022, **10**, 108330.
3. B. Shao, Z. Liu, L. Tang, Q. Liang, Q. He, T. Wu, Y. Pan, M. Cheng, Y. Liu, X. Tan, J. Tang, H. Wang, H. Feng and S. Tong, Construction of Bi<sub>2</sub>WO<sub>6</sub>/CoAl-LDHs S-scheme heterojunction with efficient photo-Fenton-like catalytic performance: Experimental and theoretical studies, *Chemosphere*, 2022, **291**, 133001.
4. M. Liu, H. Xia, W. Yang, X. Liu, J. Xiang, X. Wang, L. Hu and F. Lu, Novel Cu-Fe bi-metal oxide quantum dots coupled g-C<sub>3</sub>N<sub>4</sub> nanosheets with H<sub>2</sub>O<sub>2</sub> adsorption-activation trade-off for efficient photo-Fenton catalysis, *Applied Catalysis B: Environmental*, 2022, **301**, 120765.
5. C. Lai, D. Ma, H. Yi, M. Zhang, F. Xu, X. Huo, H. Ye, L. Li, L. Yang, L. Tang and M. Yan, Functional partition of Fe and Ti co-doped g-C<sub>3</sub>N<sub>4</sub> for photo-Fenton degradation of oxytetracycline: Performance, mechanism, and DFT study, *Separation and Purification Technology*, 2023, **306**, 122546.
6. F. Xu, C. Lai, M. Zhang, D. Ma, L. Li, S. Liu, X. Zhou, H. Yan, N. Wang, M. Xu, L. Qin and H. Yi, Graphite carbon nitride coupled with high-dispersed iron (II) phthalocyanine for efficient oxytetracycline degradation under photo-Fenton process: Performance and mechanism, *Separation and Purification Technology*, 2023, **308**, 122829.
7. A. Angkaew, C. Sakulthaew, M. Nimtim, S. Imman, T. Satapanajaru, N. Suriyachai, T. Kreetachat, S. Comfort and C. Chokejaroenrat, Enhanced Photo-

Fenton Activity Using Magnetic  $\text{Cu}_{0.5}\text{Mn}_{0.5}\text{Fe}_2\text{O}_4$  Nanoparticles as a Recoverable Catalyst for Degrading Organic Contaminants, *Water*, 2022, **14**, 3717.

8. Y. Liu, X. Wang, Q. Sun, M. Yuan, Z. Sun, S. Xia and J. Zhao, Enhanced visible light photo-Fenton-like degradation of tetracyclines by expanded perlite supported  $\text{FeMo}_3\text{O}_x/\text{g-C}_3\text{N}_4$  floating Z-scheme catalyst, *Journal of Hazardous Materials*, 2022, **424**, 127387.
9. S. Qiu, L. Gou, F. Cheng, M. Zhang and M. Guo, Novel heterostructured metal doped  $\text{MgFe}_2\text{O}_4@\text{g-C}_3\text{N}_4$  nanocomposites with superior photo-Fenton performance for antibiotics removal: One-step synthesis and synergistic mechanism, *Journal of Environmental Management*, 2022, **321**, 115907.
